# Supplementary material for: Differential levels of plasma biomarkers of neurodegeneration in Lewy body dementia, Alzheimer’s disease, frontotemporal dementia and progressive supranuclear palsy
Source: PubMed Central journal article supplement (PMC9148982; doi:10.1136/jnnp-2021-327788), 2022-01-25
Supplement: jnnp-2021-327788supp001.pdf [file jnnp-2021-327788supp001.pdf]

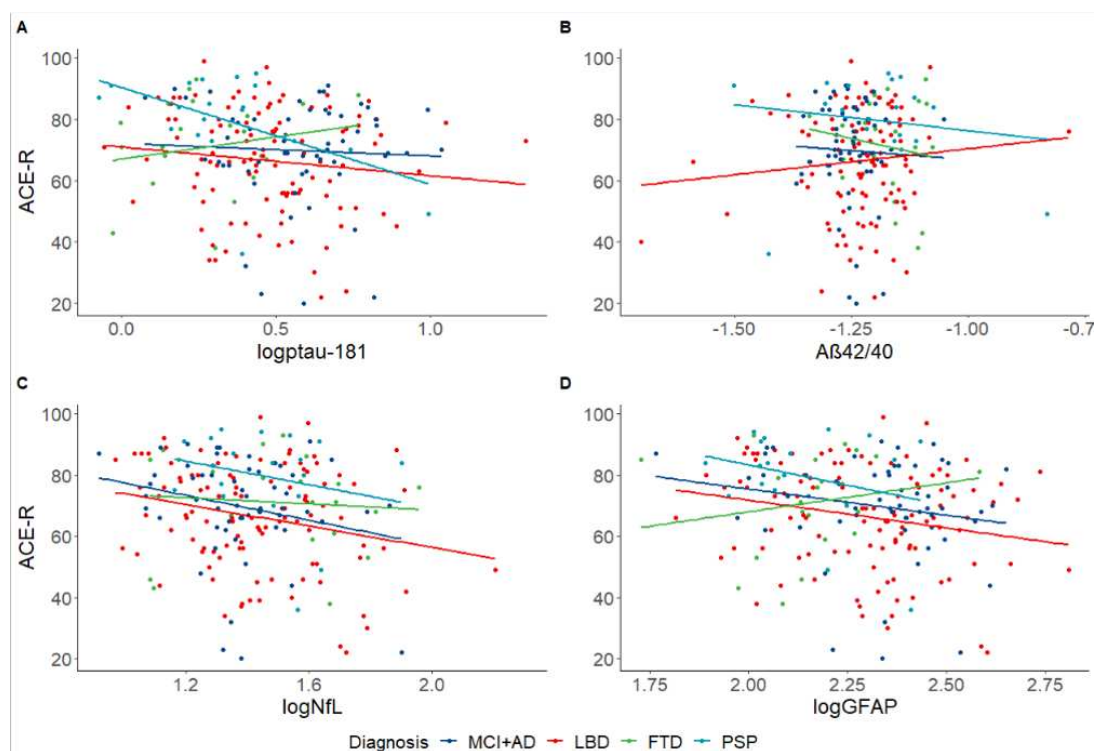

Supplementary Figure 1. Correlations between baseline cognitive function and plasma biomarkers. Baseline cognitive function was measured using the Addenbrooke's cognitive examination-revised version (ACE-R). Associations between ACE-R and the four plasma biomarkers were tested for each diagnostic group separately to examine disease specific effects. Age and sex were used as covariates. Lower ACE-R at baseline was associated with higher levels of Ptau-181 in the PSP group (A;  $\beta=-29.17$ ,  $p=0.026$ ), higher NfL in the MCI+AD group (C;  $\beta=-26.42$ ,  $p=0.045$ ) and higher GFAP in the PSP group (D;  $\beta=-73.64$ ,  $p=0.019$ ). No associations were detected between ACE-R and A $\beta$ 42/40 (B).

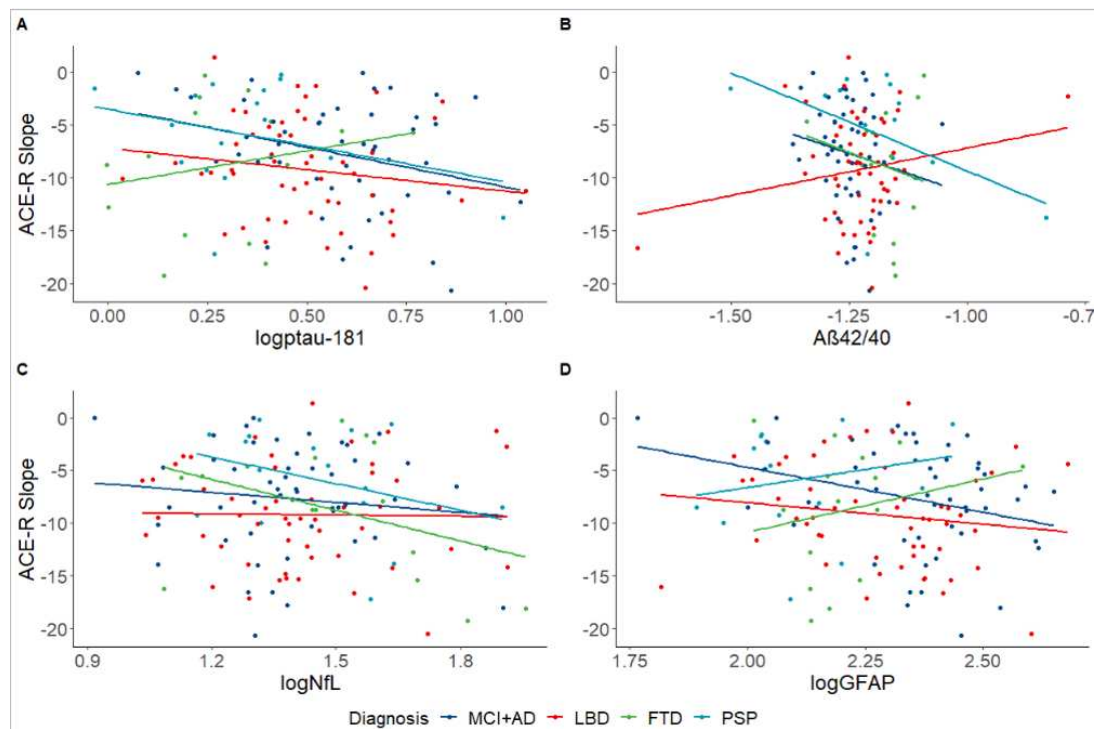

Supplementary Figure 2. Longitudinal cognitive decline and plasma biomarkers. Slopes of longitudinal cognitive decline were extracted from the annual decline in cognitive function measured using the ACE-R. Associations between ACE-R slopes and the four plasma biomarkers were tested for each diagnostic group separately to examine disease specific effects. Age and sex were used as covariates. P-tau181 (A;  $\beta$ =-7.4,  $p$ =0.040) and GFAP (D;  $\beta$ =-9.75,  $p$ =0.016) were associated with cognitive decline in the MCI+AD group. No significant associations were detected between ACE-R slopes and A $\beta$ 42/40 or NfL (B, C).
